# Supplementary material for: Fitness dynamics within a poplar hybrid zone: I. Prezygotic and postzygotic barriers impacting a native poplar hybrid stand
Source: PubMed Central journal article supplement (PMC4063464; doi:10.1002/ece3.1029), 2014-04-03
Supplement: ece30004-1629-SD2.pdf [file ece30004-1629-SD2.pdf]

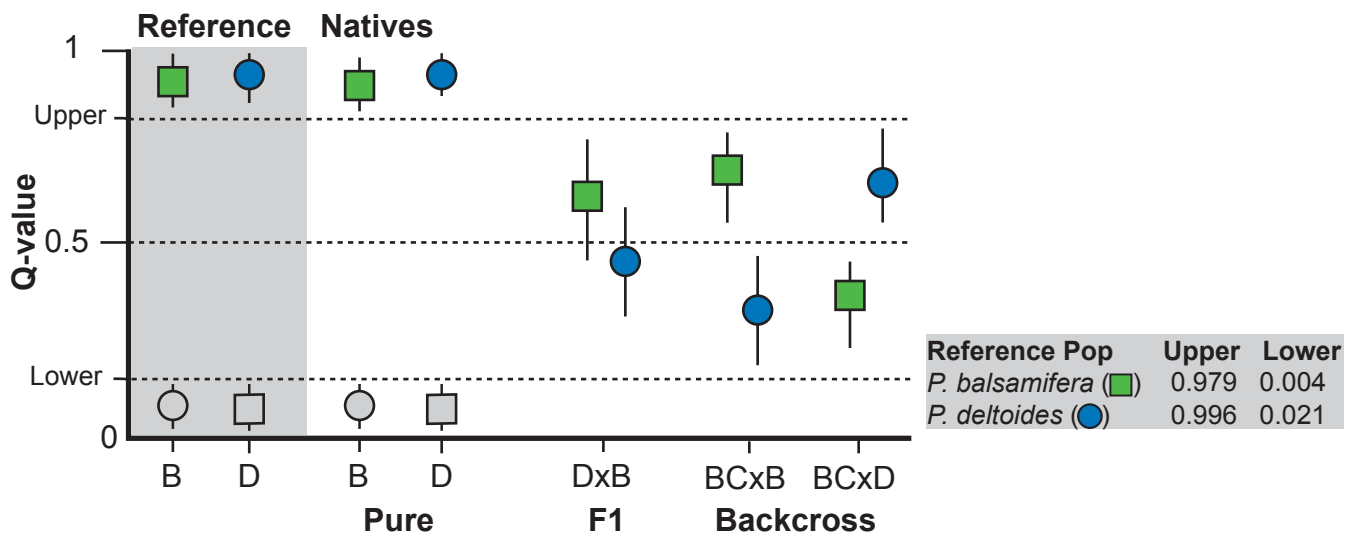

Supplemental File 1
